# Supplementary material for: Depletion of Cultivatable Gut Microbiota by Broad-Spectrum Antibiotic Pretreatment Worsens Outcome After Murine Stroke
Source: PubMed Central journal article supplement — Stroke. 2016 Apr 25;47(5):1354–63. doi: 10.1161/STROKEAHA.115.011800 (PMC4839545; doi:10.1161/strokeaha.115.011800), 2016-04-25
Supplement: str-47-1354-s002.pdf [file str-47-1354-s002.pdf]

**Acknowledgment Permission:**

Authors must provide written permission/approval from all individuals mentioned by name in the Acknowledgements section of a submitted manuscript. By signing this form, any and all acknowledged persons therefore state that they have read and approved the mention of their names in the Acknowledgment section of the aforementioned paper.

---

**Acknowledgment Permission Form**

**Journal:** Stroke

**Manuscript No:** STROKE/2015/011800DR1

**First author:** Katarzyna Winek

**Title of work:** "Elimination of microbiota worsens outcome of experimental stroke"

Hereby I confirm that I have read and approved the mention of my name in the Acknowledgement section of the above specified manuscript.

Date:

Printed name: Sabine Kolodziej

Signature:



30.12.2015

**Acknowledgment Permission:**

Authors must provide written permission/approval from all individuals mentioned by name in the Acknowledgements section of a submitted manuscript. By signing this form, any and all acknowledged persons therefore state that they have read and approved the mention of their names in the Acknowledgment section of the aforementioned paper.

---

**Acknowledgment Permission Form**

**Journal:** Stroke

**Manuscript No:** STROKE/2015/011800DR1

**First author:** Katarzyna Winek

**Title of work:** "Elimination of microbiota worsens outcome of experimental stroke"

Hereby I confirm that I have read and approved the mention of my name in the Acknowledgement section of the above specified manuscript.

Date: 30. 11. 2015

Printed name: Yvonne Amoneit

Signature: 

**Acknowledgment Permission:**

Authors must provide written permission/approval from all individuals mentioned by name in the Acknowledgements section of a submitted manuscript. By signing this form, any and all acknowledged persons therefore state that they have read and approved the mention of their names in the Acknowledgment section of the aforementioned paper.

---

**Acknowledgment Permission Form**

**Journal:** Stroke

**Manuscript No:** STROKE/2015/011800DR1

**First author:** Katarzyna Winek

**Title of work:** "Elimination of microbiota worsens outcome of experimental stroke"

Hereby I confirm that I have read and approved the mention of my name in the Acknowledgement section of the above specified manuscript.

Date: *21st January 2016*

Printed name: Catherine Aubel

Signature: *Catherine Aubel*

**Acknowledgment Permission:**

Authors must provide written permission/approval from all individuals mentioned by name in the Acknowledgements section of a submitted manuscript. By signing this form, any and all acknowledged persons therefore state that they have read and approved the mention of their names in the Acknowledgment section of the aforementioned paper.

---

**Acknowledgment Permission Form**

**Journal:** Stroke

**Manuscript No:** STROKE/2015/011800DR1

**First author:** Katarzyna Winek

**Title of work:** "Elimination of microbiota worsens outcome of experimental stroke"

Hereby I confirm that I have read and approved the mention of my name in the Acknowledgement section of the above specified manuscript.

Date: 01/04/16

Printed name: Gernot Reifenberger

Signature:



**Acknowledgment Permission:**

Authors must provide written permission/approval from all individuals mentioned by name in the Acknowledgements section of a submitted manuscript. By signing this form, any and all acknowledged persons therefore state that they have read and approved the mention of their names in the Acknowledgment section of the aforementioned paper.

---

**Acknowledgment Permission Form**

**Journal:** Stroke

**Manuscript No:** STROKE/2015/011800DR1

**First author:** Katarzyna Winek

**Title of work:** "Elimination of microbiota worsens outcome of experimental stroke"

Hereby I confirm that I have read and approved the mention of my name in the Acknowledgement section of the above specified manuscript.

Date:

12-01-15

Printed name: Silvia Schulze

Signature:

Schulze
